# Supplementary material for: Controllable fabrication of a Cs2AgBiBr6 nanocrystal/mesoporous black TiO2 hollow sphere composite for photocatalytic benzyl alcohol oxidation
Source: Royal Society of Chemistry journal article supplement (doi:10.1039/d2ta09989f), 2023-01-01
Supplement: d2ta09989f1.pdf [file d2ta09989f1.pdf]

# Supporting Information

## Controllable fabrication of Cs<sub>2</sub>AgBiBr<sub>6</sub> nanocrystal/ mesoporous black TiO<sub>2</sub> hollow spheres composite for photocatalytic benzyl alcohol oxidation

Menghan Yu<sup>1</sup>, Nan Wang<sup>1</sup>, Kuo Lin<sup>1</sup>, Dongxue Song<sup>1</sup>, Jie Chen<sup>1</sup>, Teng Liang<sup>2</sup>, Jianhui Sun<sup>2</sup>, Kai Pan<sup>1,\*</sup> and Honggang Fu<sup>1,\*</sup>

<sup>1</sup> Key Laboratory of Functional Inorganic Material Chemistry, Ministry of Education, Heilongjiang University, Harbin, 150080, China

Corresponding author: kaipan@hlju.edu.cn; fuhg@hlju.edu.cn; fuhg@vip.sina.com

<sup>2</sup> College of Physics Science and Technology, Heilongjiang University, Harbin, 150080, China

### Experimental section

#### Synthesis of mesoporous black TiO<sub>2</sub> hollow spheres

Typically, TBOT (0.1 g) and anhydrous oxalic acid (7.25 g) were dissolved into N, N-dimethylformamide (65 mL) and stirred for 45 minutes. Then, the mixture was transformed into a 100 mL autoclave and maintained at 170 °C for 12 hours. the resulting product was washed by ethanol and water for several times. The sample was dried at 60 °C. Subsequently, the product was refluxed with ethylenediamine aqueous solution (pH=10). The obtained powders were washed with deionized water several times and dried at 60 °C overnight. Finally, the resulting samples were calcined in air at 500 °C and in hydrogen at 600 °C to form mesoporous black TiO<sub>2</sub> hollow spheres.

#### Preparation of lead-free Cs<sub>2</sub>AgBiBr<sub>6</sub> nanocrystals

The monodisperse Cs<sub>2</sub>AgBiBr<sub>6</sub> nanocrystals was prepared with a standard Schlenk line. First, bismuth acetate (0.097 g), silver acetate (0.042 g), cesium acetate (0.136 g) were put into a three-necked flask with 5 ml octadecene, 1.25 ml oleylamine, 0.25ml oleic acid as mixed solvents for dissolution. Then, the solution was heated into 120°C for 60 min. Third, it was heated to 145°C, and 2.5ml trimethylbromosilane was quickly injected into solution. When the solution changed from brown into yellow, monodisperse Cs<sub>2</sub>AgBiBr<sub>6</sub> nanocrystals was obtained. The sample was washed and re-

dispersed with n-hexane for several times.

### **Characterization**

The crystal structure was analyzed by Bruker D8 Advance X-ray powder diffraction (Cu K $\alpha$ ,  $\lambda$  = 1.5406 Å, 40 kV, 40 mA) with a scanning speed of 10° /min and a step size of 0.01° to obtain XRD patterns. Scanning electron microscope (SEM, acceleration voltage 5 kV, Hitachi S-4800) and transmission electron microscope (TEM, JEOL JEM-2100) were used to investigate the surface morphology of the samples. X-ray photoelectron spectroscopy (XPS, Kratos, ULTRA AXIS DLD) using monochromatic Al K $\alpha$  (hv= 1486.6 eV) radiation. All binding energies were calibrated with reference to the C 1s peak at 284.6 eV. The UV-visible diffuse reflectance spectra (UV-vis DRS) of the samples were obtained from the UV-vis spectrophotometer test (Shimadzu UV-2550). The function works of black TiO<sub>2</sub>, Cs<sub>2</sub>AgBiBr<sub>6</sub> and Cs<sub>2</sub>AgBiBr<sub>6</sub>/black TiO<sub>2</sub> were determined using the Scanning Kelvin probe (SKP5050 system Scotland) at the room temperature condition. Electron paramagnetic resonance (EPR) measurements were performed on a Bruker EMX plus type spectrometer at the room temperature. N-tert-Butyl- $\alpha$ -phenylnitron (PBN) was used as a trapping reagent to characterize the suspension of benzyl alcohol after illumination. Surface photovoltage spectroscopy (SPS) using a home-built device with a lock-in amplifier (SR830) synchronized with an optical chopper (SR540). Transient-state surface photovoltage spectroscopy (TPV) was tested at room temperature by using a second harmonic Nd: YAG laser (Lab-130-10H, Newport, Co.) excited by a radiation pulse with 10 ns width. The signal was amplified with a preamplifier and then registered by a 1 GHz digital phosphor oscilloscope (DPO4104B, Tektronix).

### **Photocatalytic activity**

We have investigated the photocatalytic activity of Cs<sub>2</sub>AgBiBr<sub>6</sub> nanocrystal/black TiO<sub>2</sub> was carried out in a photocatalytic reaction cell. 10 mg of photocatalyst was dispersed in 5 ml of cyclohexane and 0.1mmol of benzyl alcohol solution. Prior to irradiation, the entire photocatalytic reactor was evacuated and filled with N<sub>2</sub> to ensure that the interior is free of air and in an anaerobic state followed by a 300 W Xenon lamp visible light irradiation equipped with simulated sunlight (AM1.5G) for 8 h at normal temperature and pressure. After the reaction done, H<sub>2</sub> amount was tested by a gas chromatography (GC), and the liquids were detected by gas chromatography-mass spectrometry (GC-MS). The conversion and selectivity of photocatalytic oxidation of benzyl alcohol can be calculated by the following equation (S1) and (S2):

$$\text{Conversion (\%)} : X = (C_0 - C_1) / C_0 \times 100 \quad (\text{S1})$$

$$\text{Selectivity (\%)} : S = 100 \times C_p / (C_0 - C_1) \quad (\text{S2})$$

where  $C_0$  and  $C_1$  and  $C_p$  are the concentration of benzyl alcohol before and after the reaction, and the amount of target product benzaldehyde, respectively.

### **Photoelectrochemical measurements**

All electrochemical and photoelectrochemical measurements were performed by a standard three-electrode system (Princeton Versa STAT). In general, Ag/AgCl was used as the reference electrode and platinum as the counter electrode, and the prepared FTO membrane electrode was used as the working electrode. A solution of 1-butyl-3-methylimidazolium hexafluorophosphate in dichloromethane was used as an electrolyte (0.1 M) and purged with  $N_2$  for 3 h before the test. Mott-Schottky tests were performed at three different frequencies (800, 1000, 1200 Hz) to obtain the spectra. Transient photocurrent responses were also collected under illumination with a bright and dark AM 1.5G light source, as well as electrochemical impedance spectra under illumination conditions.

### **Active species trapping experiments**

Small amounts of methanol ( $CH_3OH$ ), benzoquinone ( $C_6H_4O_2$ ) and carbon tetrachloride ( $CCl_4$ ) were added to the photocatalytic reaction system to find out the effect of the corresponding active substances in the photocatalytic reaction, respectively. Among them, methanol was the  $h^+$  scavenger, benzoquinone was the  $\cdot O_2^-$  radical scavenger, and carbon tetrachloride was the  $e^-$  scavenger.

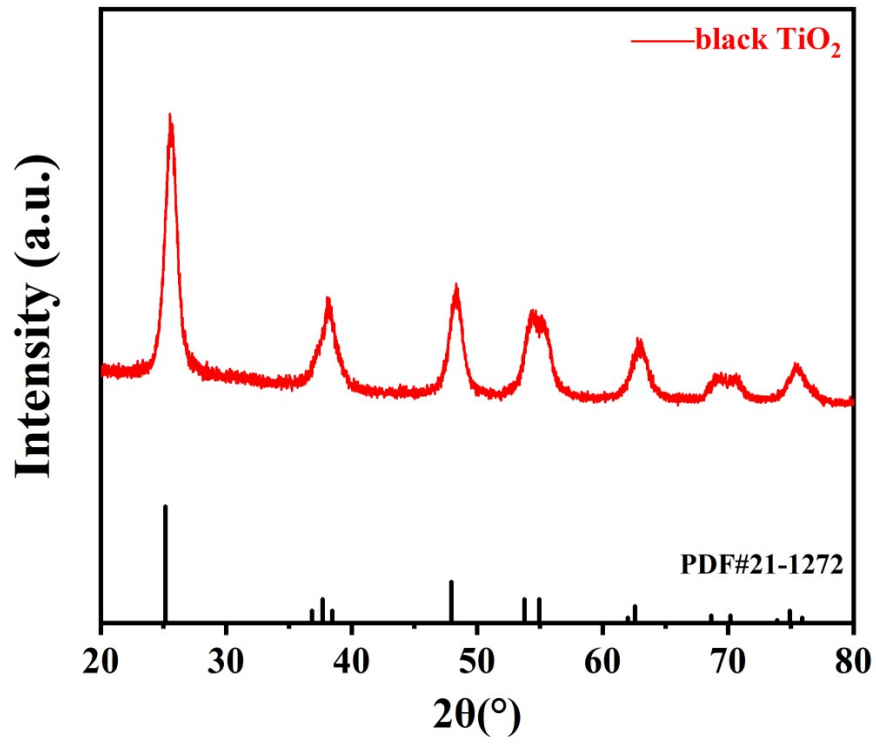

Fig. S1. XRD pattern of black TiO<sub>2</sub> hollow spheres.

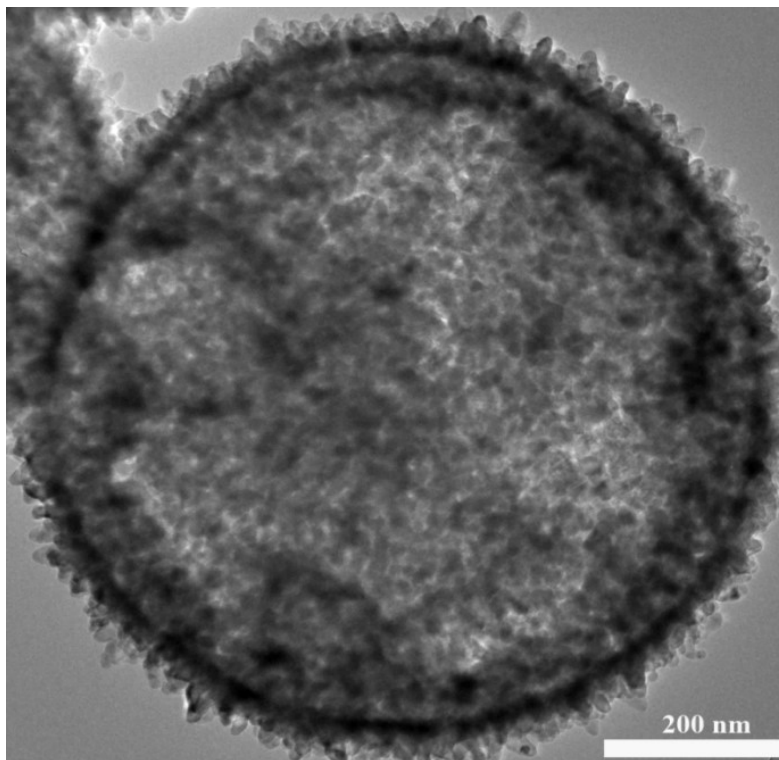

**Fig. S2.** TEM image of black TiO<sub>2</sub> hollow spheres.

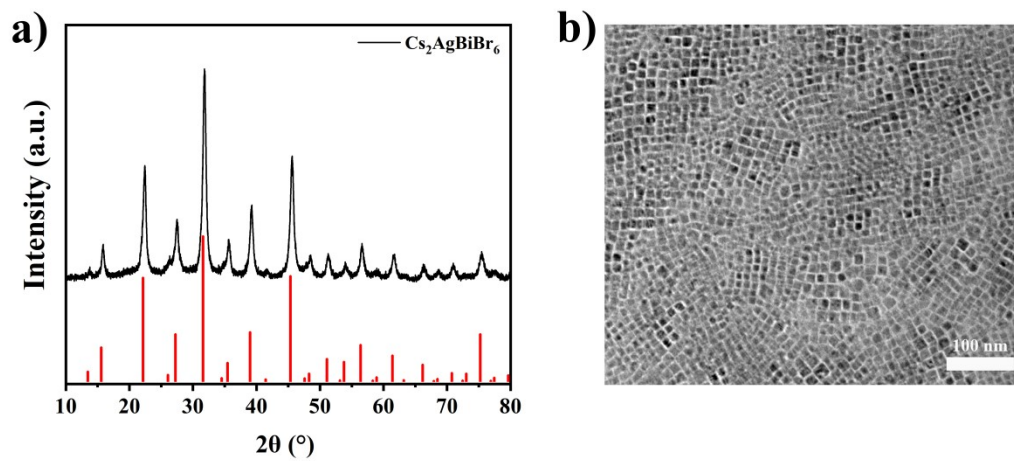

**Fig. S3.** XRD (a) and TEM images (b) of  $\text{Cs}_2\text{AgBiBr}_6$  nanocrystals.

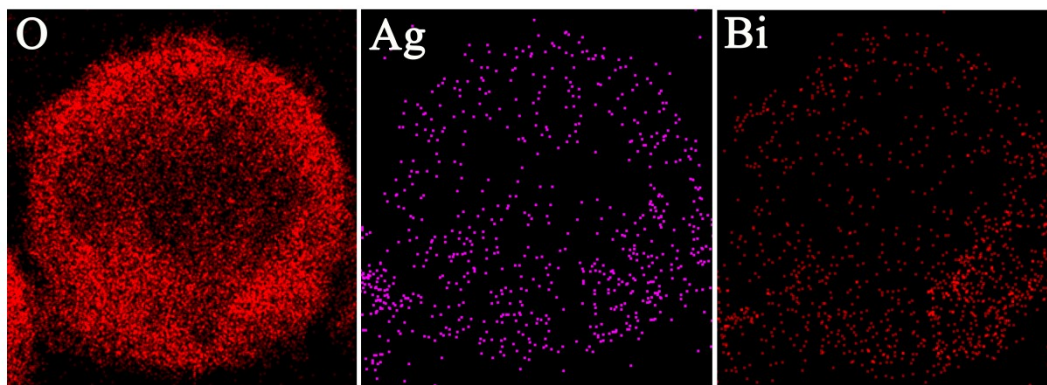

Fig. S4. Element mapping images of O, Ag, and Bi.

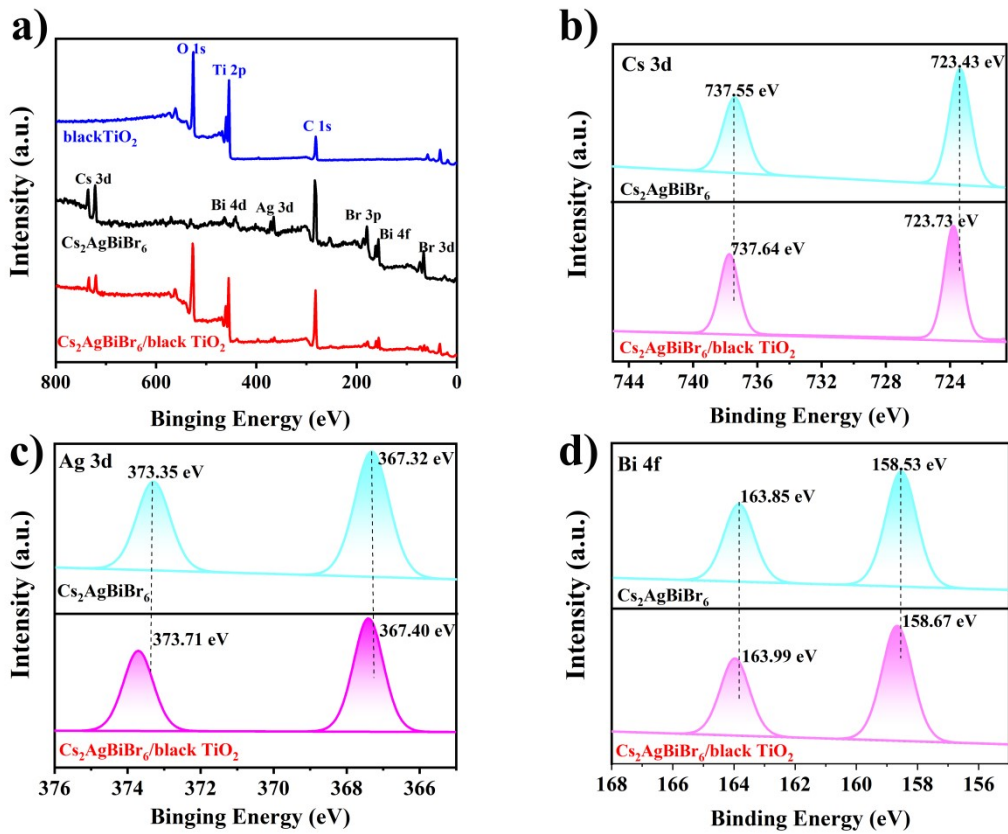

**Fig. S5.** (a) Survey XPS spectra of the black TiO<sub>2</sub>, Cs<sub>2</sub>AgBiBr<sub>6</sub> nanocrystals and Cs<sub>2</sub>AgBiBr<sub>6</sub> nanocrystal/black TiO<sub>2</sub>.

(b-d) XPS spectra of Cs 3d, Ag 3d, and Bi 4f of samples.



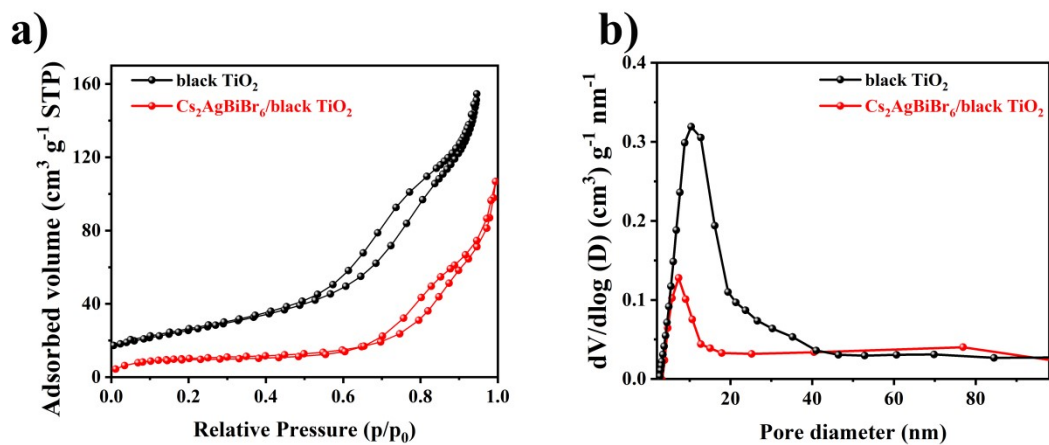

Fig. S6. (a) nitrogen sorption isotherms, and (b) corresponding pore size distribution curves of Cs<sub>2</sub>AgBiBr<sub>6</sub>/black TiO<sub>2</sub> tandem heterojunctions, and black TiO<sub>2</sub> microspheres, respectively.

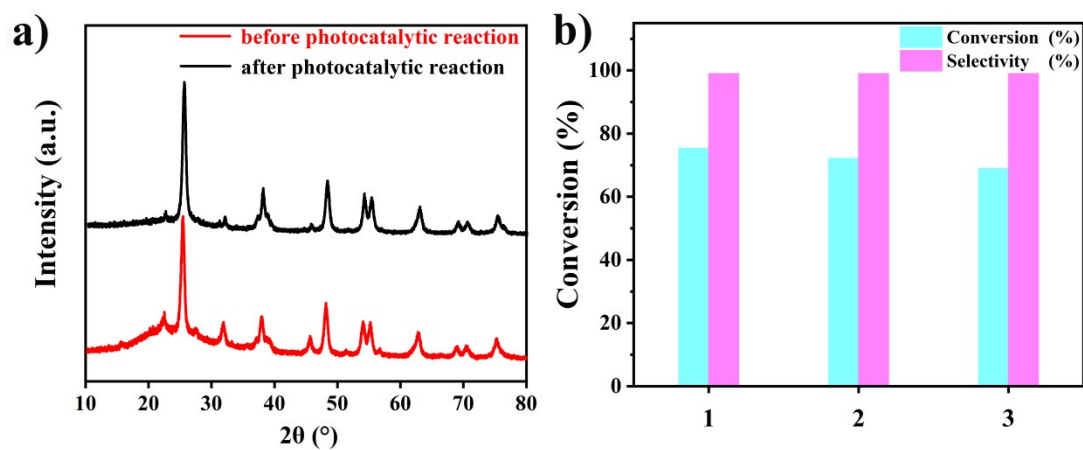

Fig. S7. Benzyl alcohol selective oxidation stability of Cs<sub>2</sub>AgBiBr<sub>6</sub> nanocrystal /black TiO<sub>2</sub>.

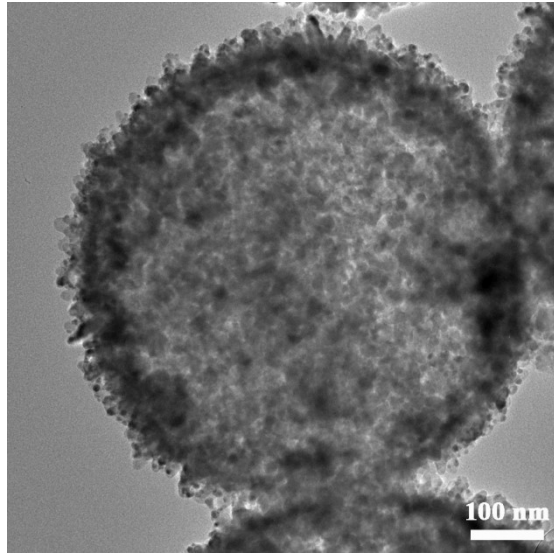

**Fig. S8.** TEM image of  $\text{Cs}_2\text{AgBiBr}_6$  nanocrystal/black  $\text{TiO}_2$  after three times reactions.

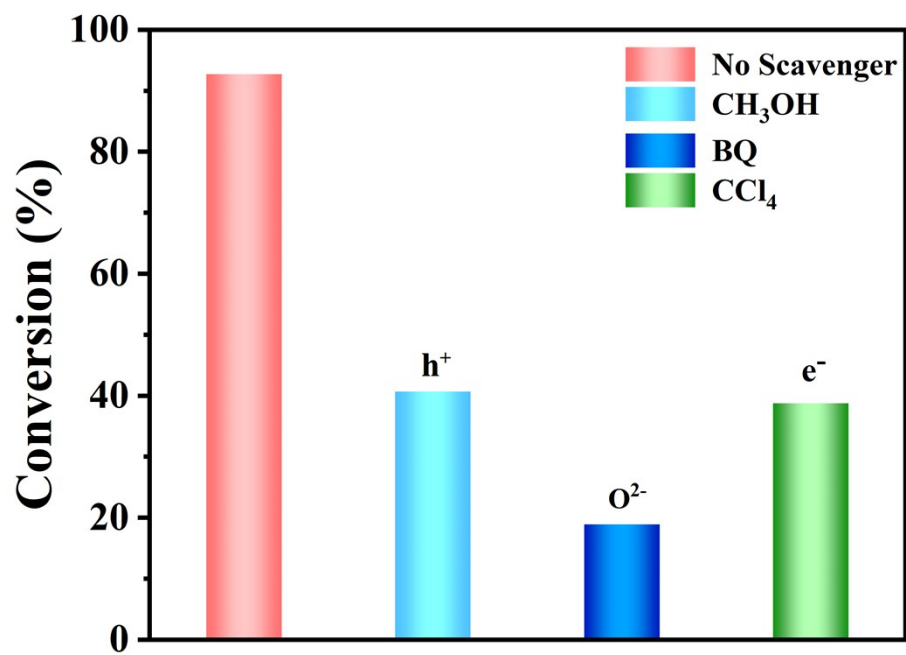

Fig. S9. Photocatalytic activity of Cs<sub>2</sub>AgBiBr<sub>6</sub> nanocrystal/black TiO<sub>2</sub> for selective oxidation of benzyl alcohol with or without different scavengers at O<sub>2</sub> atmosphere.

**Table S1.** Summary of the photocatalytic selective oxidation of benzyl alcohol of TiO<sub>2</sub>-based catalysts.

| Photocatalyst                                                           | Reaction conditions                              | Atmosphere     | Conversion | Selectivity | Ref.      |
|-------------------------------------------------------------------------|--------------------------------------------------|----------------|------------|-------------|-----------|
| 5-Cs <sub>2</sub> AgBiBr <sub>6</sub> /black TiO <sub>2</sub>           | 300W Xe lamp<br>AM 1.5G, 8h                      | N <sub>2</sub> | 75.39%     | 99%         | This Work |
| 5-Cs <sub>2</sub> AgBiBr <sub>6</sub> /black TiO <sub>2</sub>           | 300W Xe lamp<br>AM 1.5G, 8h                      | O <sub>2</sub> | 92.72%     | 85.24%      | This Work |
| 5-Cs <sub>2</sub> AgBiBr <sub>6</sub> /black TiO <sub>2</sub>           | 300W Xe lamp<br>$\lambda > 400\text{nm}$ , 8h    | N <sub>2</sub> | 18.2%      | 99%         | This Work |
| 5-Cs <sub>2</sub> AgBiBr <sub>6</sub> /black TiO <sub>2</sub>           | 300W Xe lamp<br>$\lambda > 400\text{nm}$ , 8h    | Air            | 27.56%     | 99%         | This Work |
| 15% FAPbBr <sub>3</sub> /TiO <sub>2</sub>                               | 300W Xe lamp<br>$\lambda > 420\text{nm}$ , 8h    | O <sub>2</sub> | 63%        | 99%         | S1        |
| Bi <sub>2</sub> MoO <sub>6</sub> @TiO <sub>2</sub> NTA                  | 300W Xe lamp<br>AM 1.5G, 8h                      | O <sub>2</sub> | 67.4%      | 98.6%       | S2        |
| TiO <sub>2</sub> /WO <sub>3</sub>                                       | 5W LED lamp<br>395 < $\lambda$ < 550 nm          | O <sub>2</sub> | 68%        | 99%         | S3        |
| I-TiO <sub>2</sub> / (20 wt%) CNNSs                                     | 10W blue LED lamp, 8h                            | O <sub>2</sub> | 29%        | 99%         | S4        |
| TiO <sub>2</sub> /MAGSNC                                                | 125W lamp<br>$\lambda = 365\text{ nm}$ , 4h      | O <sub>2</sub> | 50%        | 90%         | S5        |
| QH-COF@TiO <sub>2</sub>                                                 | 300W Xe lamp<br>$\lambda \geq 420\text{nm}$ , 4h | O <sub>2</sub> | 77%        | 95%         | S6        |
| TiO <sub>2</sub> @Ag@ZnO                                                | 300W Xe lamp<br>AM 1.5G, 1h                      | Air            | 86.2%      | 51.1%       | S7        |
| Pd-Zn/TiO <sub>2</sub>                                                  | 300W Xe lamp<br>AM 1.5G, 1h,<br>120°C            | O <sub>2</sub> | 55%        | 81%         | S8        |
| TBCN@3%rGO                                                              | 250W Xe lamp<br>$\lambda > 420\text{nm}$ , 5h    | O <sub>2</sub> | 79.7%      | 97.3%       | S9        |
| 12.4% Cs <sub>3</sub> Bi <sub>2</sub> Br <sub>9</sub> /TiO <sub>2</sub> | 300W Xe lamp<br>$\lambda > 420\text{nm}$ , 8h    | O <sub>2</sub> | 73%        | 97.7%       | S10       |
| Cs <sub>3</sub> Sb <sub>2</sub> Br <sub>9</sub> -50                     | 500W Xe lamp<br>$\lambda > 420\text{nm}$         | O <sub>2</sub> | 88%        | 88%         | S11       |

|                                                          |                                                        |                |        |       |     |
|----------------------------------------------------------|--------------------------------------------------------|----------------|--------|-------|-----|
| FAPbBr <sub>3</sub> /WO <sub>3</sub>                     | 300W Xe lamp<br>AM 1.5G, 4h                            | O <sub>2</sub> | 65.71% | 90%   | S12 |
| CsPbX <sub>3</sub> /W <sub>18</sub> O <sub>49</sub>      | 150cW Xe lamp<br>AM 1.5G,8h                            | O <sub>2</sub> | 72%    | 99%   | S13 |
| Pt-g-C <sub>3</sub> N <sub>4</sub>                       | 300W Xe lamp<br>$\lambda > 400\text{nm}$ , 20h         | Ar             | 40%    | 90%   | S14 |
| SA-Fe/N <sub>4,5</sub> -C                                | 300W Xe lamp<br>AM 1.5G, 24h                           | O <sub>2</sub> | 92.7%  | 96.4% | S15 |
| Bi <sub>2</sub> MoO <sub>6</sub>                         | 300W Xe lamp<br>$\lambda > 400\text{nm}$ , 4h          | O <sub>2</sub> | 37.4%  | 99%   | S16 |
| VC/CdS-15                                                | 300W Xe lamp<br>$\lambda > 420\text{nm}$ , 2h          | N <sub>2</sub> | 41%    | 99%   | S17 |
| ZnO/C <sub>3</sub> N <sub>4</sub> -600                   | 10W blue LED<br>lamp, $\lambda=400-405\text{nm}$ , 12h | O <sub>2</sub> | 74.6%  | 99%   | S18 |
| ZnFe <sub>2</sub> O <sub>4</sub> /UiO-66-NH <sub>2</sub> | 300W Xe lamp<br>AM 1.5G, 5h                            | O <sub>2</sub> | 68%    | 99%   | S19 |
| AgBr@Ag@TiO <sub>2</sub>                                 | 300 W Xe lamp<br>$\lambda \geq 420 \text{ nm}$ 6h      | O <sub>2</sub> | 73%    | 98%   | S20 |
| TiO <sub>2</sub> @COF-3                                  | Visible light $\lambda > 420 \text{ nm}$ ,<br>30h      | O <sub>2</sub> | 92.5%  | 99%   | S21 |

---

## References

- S1. H. Huang, H. Yuan, K. P. F. Janssen, G. Solís-Fernández, Y. Wang, C. Y. X. Tan, D. Jonckheere, E. Debroye, J. Long, J. Hendrix, J. Hofkens, J. A. Steele and B. J. Roeffaers, *ACS Energy Lett.*, 2018, **3**, 755-759.
- S2. Z. Zhou, Y. N. Xie, W. Zhu, H. Zhao, N. Yang and G. Zhao, *Appl. Catal. B*, 2021, **286**, 119868.
- S3. E. Safaei, S. Mohebbi and M. Irani, *J. Sol-Gel. Sci. Techn.*, 2018, **87**, 170-182.
- S4. B. Akhtar, H. Ghafuri and A. Rashidzadeh, *Mol. Catal.*, 2021, **506**, 111527.
- S5. J. C. Colmenares, W. Ouyang, M. Ojeda, E. Kuna, O. Chernyayeva, D. Lisovytskiy, S. De, R. Luque and A. M. Balu, *Appl. Catal. B*, 2016, **183**, 107-112.
- S6. H. Li, H. Liu, C. Li, J. Liu, J. Liu and Q. Yang, *J. Mater. Chem. A*, 2020, **8**, 18745-18754.
- S7. S. Li, J. Cai, X. Wu and F. Zheng, *Appl. Surf. Sci.*, 2018, **443**, 603-612.
- S8. E. Nowicka, S. Althahban, T. D. Leah, G. Shaw, D. Morgan, C. J. Kiely, A. Roldan and G. J. Hutchings, *Sci. Tech. Adv. Mat.*, 2019, **20**, 367-378.
- S9. A. Behera, A. K. Kar and R. Srivastava, *Inorg Chem.*, 2022, **61**, 12781-12796.
- S10. Q. Sun, W. Ye, J. Wei, L. Li, J. Wang, J. H. He and J. M. Lu, *J Alloy Compd.*, 2018, **893**, 162326.
- S11. D. Wu, W. Sang, B. Huo, J. Wang, X. Wang, C. Chen, Q. Huang and X. Tang, *J. Catal.*, 2022, **408**, 36-42.
- S12. W. Wang, H. Huang, X. Ke, X. Liu, S. Yang, K. Wang, L. Huang, C. Tu, Z. Zheng, D. Luo and M. Zhang, *Mater. Design.*, 2022, **215**, 110502.
- S13. R. Cheng, J. A. Steele, M. B. J. Roeffaers, J. Hofkens and E. Debroye, *ACS Appl. Energy. Mater.*, 2021, **4**, 3460-3468.
- S14. F. Li, Y. Wang, J. Du, Y. Zhu, C. Xu and L. Sun, *Appl. Catal. B*, 2018, **225**, 258-263.
- S15. Q. Wei, J. Wang and W. Shen, *Appl Catal. B*, 2021, **292**, 120195.
- S16. K. Jing, W. Ma, Y. Ren, J. Xiong, B. Guo, Y. Song, S. Liang and L. Wu, *Appl Catal. B*, 2019, **243**, 10-18.
- S17. M. Tayyab, Y. Liu, S. Min, R. Muhammad Irfan, Q. Zhu, L. Zhou, J. Lei and J. Zhang, *Chinese J. Catal.*, 2022, **43**, 1165-1175.
- S18. X. Jiang, W. Wang, H. Wang, Z. H. He, Y. Yang, K. Wang, Z. T. Liu and B. Han, *Green Chem.*, 2022, **24**, 7652-7660.
- S19. J. Liu, X. Sun, B. Jiang, M. Liu, Q. Li, X. Xiao, H. Wang, M. Zheng, S. Guo, J. Wu, Y. Zhang, K. Shi and W. Zhou, *ACS Appl. Nano. Mater.*, 2022, **5**, 2231-2240.
- S20. P. Zhang, P. Wu, S. Bao, Z. Wang, B. Tian and J. Zhang, *Chem. Eng. J.*, 2016, **306**, 1151-1161.
- S21. G. Lu, X. Huang, Z. Wu, Y. Li, L. Xing, H. Gao, W. Dong and G. Wang, *Appl. Surf. Sci.*, 2019, **493**, 551-560.
